# Supplementary material for: Simultaneous Determination of Multi-Mycotoxins in Cereal Grains Collected from South Korea by LC/MS/MS
Source: PubMed Central journal article supplement (PMC5371861; doi:10.3390/toxins9030106), 2017-03-16
Supplement: toxins-09-00106-s001.pdf [file toxins-09-00106-s001.pdf]

# Supplementary Materials: Simultaneous Determination of Multi-Mycotoxins in Cereal Grains Collected from South Korea by LC/MS/MS

Dong-Ho Kim, Sung-Yong Hong, Jea Woo Kang, Sung Min Cho, Kyu Ri Lee, Tae Kyung An, Chan Lee and Soo Hyun Chung

(A)

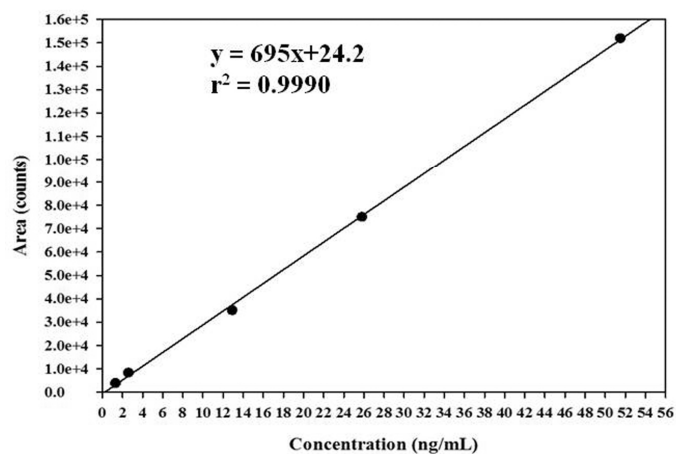

(B)

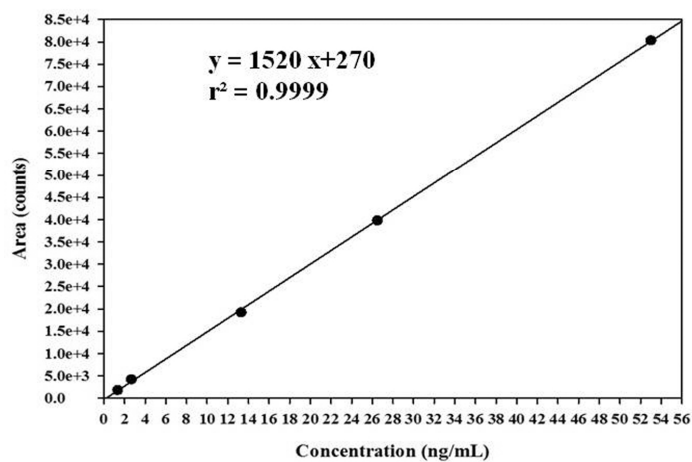

(C)

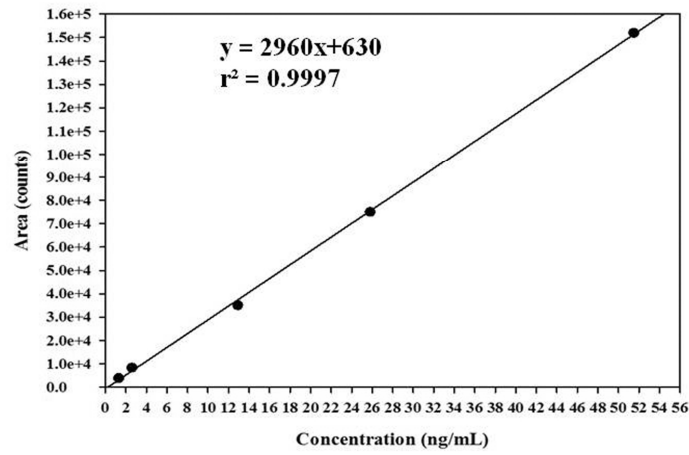

(D)

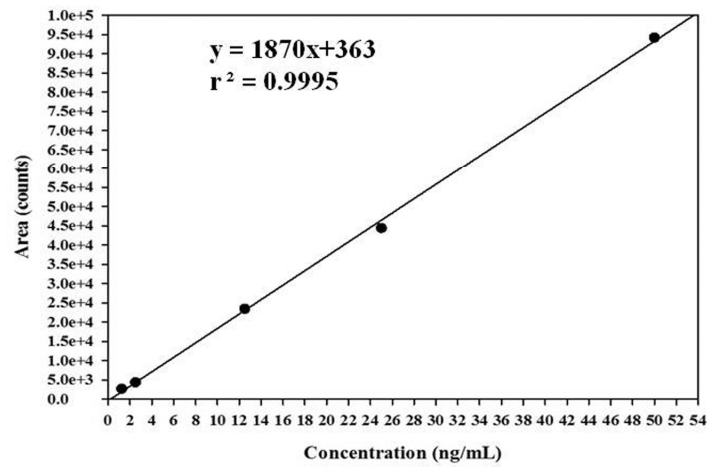

(E)

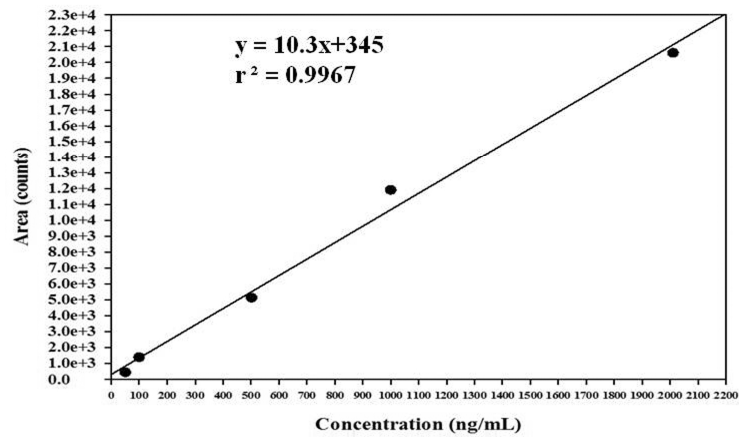

**(F)**

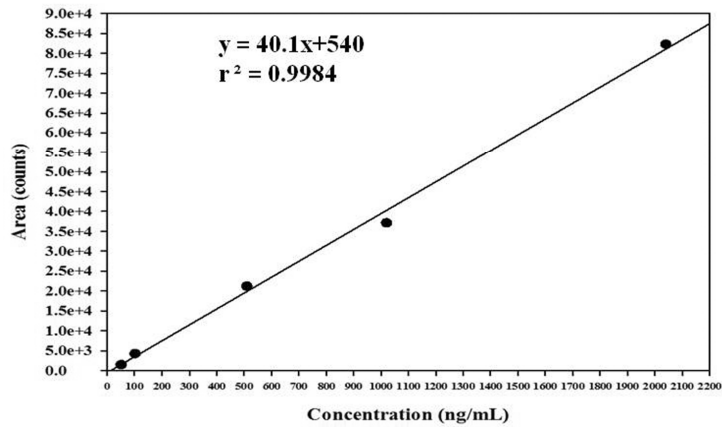

**(G)**

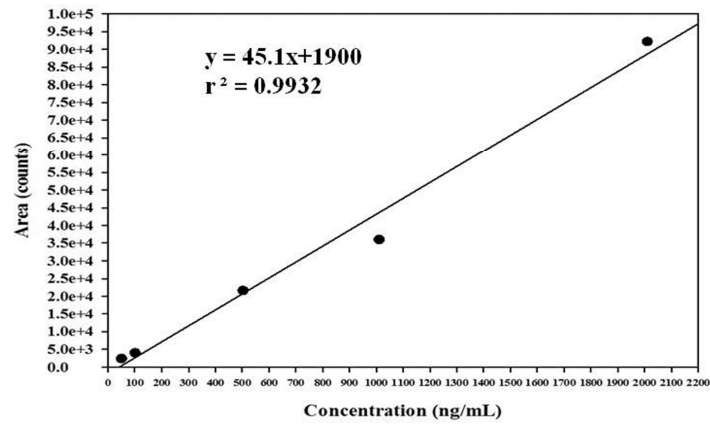

**(H)**

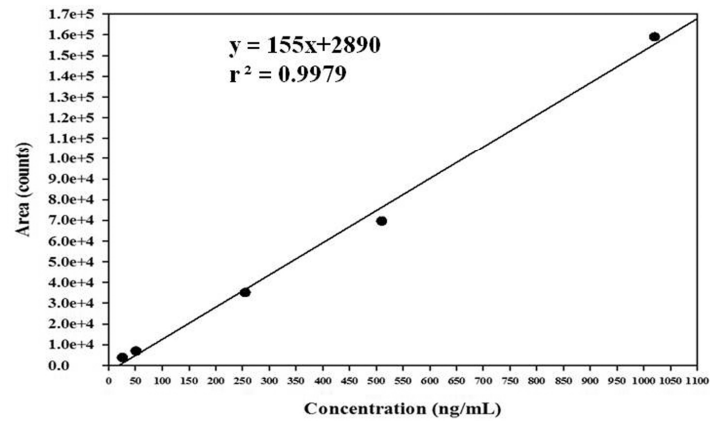

**(I)**

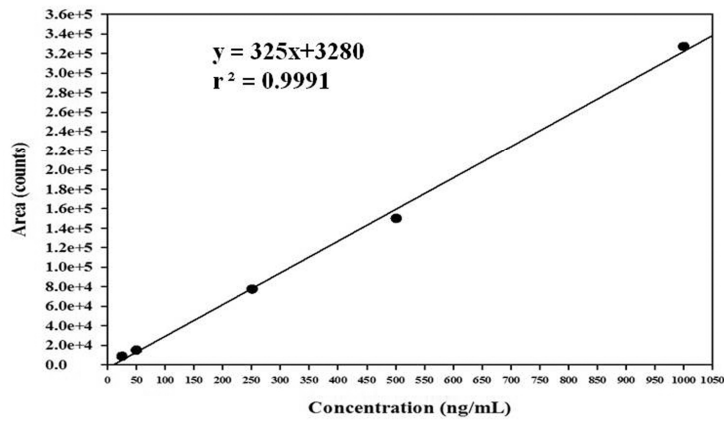

(i)

**(J)**

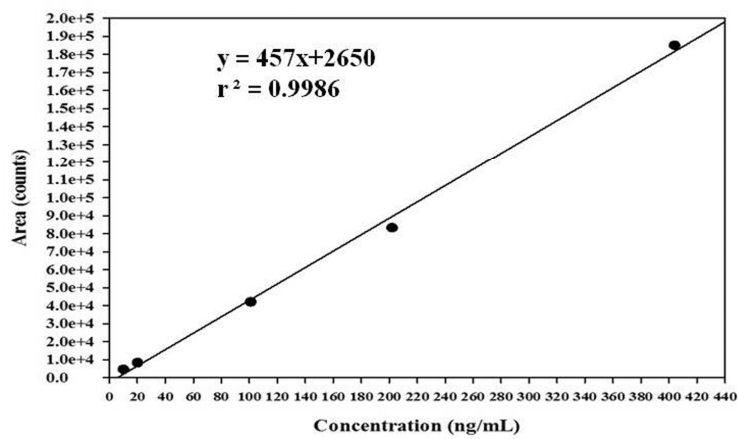

**(K)**

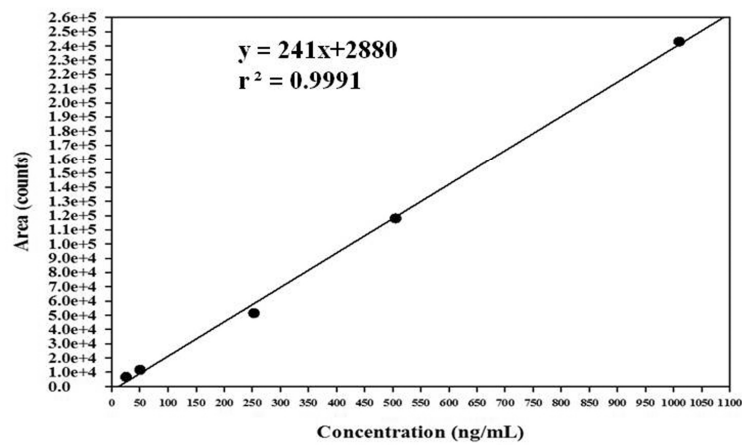

(L)

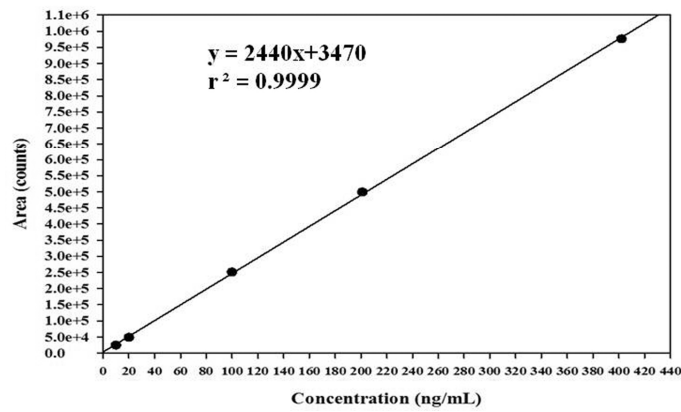

(M)

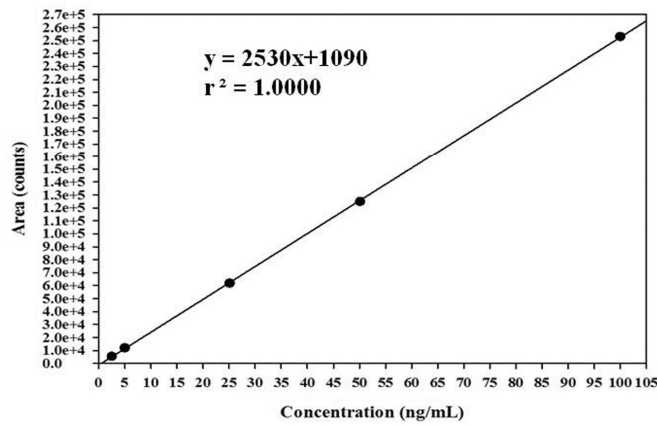

**Figure S1.** Calibration curves of 13 mycotoxins. A series of standard solutions for each toxin were prepared in the range of 1.325, 2.65, 13.25, 26.5, and 53 ng/mL. The standard solutions for each toxin were injected into LC/MS/MS in triplicate. Calibration curves of (A) AFB<sub>1</sub> (B) AFB<sub>2</sub> (C) AFG<sub>1</sub> (D) AFG<sub>2</sub> (E) NIV (F) DON (G) 3-AcDON (H) FB<sub>1</sub> (I) FB<sub>2</sub> (J) T-2 (K) HT-2 (L) ZEN (M) OTA are shown.

**Table S1.** LODs and LOQs of 13 mycotoxins in 5 types of cereal grains.

| Cereal grain | Toxin            | LOD (S/N=3,<br>ng/g) | LOQ (S/N=10,<br>ng/g) | Toxin            | LOD (S/N=3,<br>ng/g) | LOQ (S/N=10,<br>ng/g) |
|--------------|------------------|----------------------|-----------------------|------------------|----------------------|-----------------------|
| Brown rice   |                  | 14.9                 | 45.1                  |                  | 6.0                  | 18.3                  |
| Millet       |                  | 15.2                 | 46.1                  |                  | 12.1                 | 36.7                  |
| Sorghum      | NIV              | 18.1                 | 54.8                  | DON              | 17.7                 | 53.6                  |
| Maize        |                  | 12.4                 | 37.6                  |                  | 17.0                 | 51.4                  |
| Mixed cereal |                  | 13.8                 | 41.8                  |                  | 12.6                 | 38.2                  |
| Brown rice   |                  | 2.5                  | 7.6                   |                  | 0.4                  | 1.3                   |
| Millet       |                  | 4.8                  | 14.5                  |                  | 0.7                  | 2.0                   |
| Sorghum      | 3-AcDON          | 4.5                  | 13.6                  | ZEN              | 0.5                  | 1.5                   |
| Maize        |                  | 4.7                  | 14.2                  |                  | 0.8                  | 2.5                   |
| Mixed cereal |                  | 4.7                  | 4.7                   |                  | 0.2                  | 0.6                   |
| Brown rice   |                  | 0.3                  | 0.8                   |                  | 0.1                  | 0.4                   |
| Millet       |                  | 0.4                  | 1.1                   |                  | 0.3                  | 0.8                   |
| Sorghum      | AFB <sub>1</sub> | 0.7                  | 2.2                   | AFB <sub>2</sub> | 0.4                  | 1.1                   |
| Maize        |                  | 0.7                  | 2.1                   |                  | 0.5                  | 1.4                   |
| Mixed cereal |                  | 0.4                  | 1.2                   |                  | 0.2                  | 1.0                   |
| Brown rice   |                  | 1.1                  | 3.4                   |                  | 0.1                  | 0.4                   |
| Millet       |                  | 1.0                  | 3.0                   |                  | 0.3                  | 0.9                   |
| Sorghum      | AFG <sub>1</sub> | 1.6                  | 4.8                   | AFG <sub>2</sub> | 0.5                  | 1.4                   |
| Maize        |                  | 0.8                  | 2.3                   |                  | 0.6                  | 1.9                   |
| Mixed cereal |                  | 0.1                  | 0.4                   |                  | 0.3                  | 1.0                   |
| Brown rice   |                  | 0.8                  | 2.3                   |                  | 0.7                  | 2.2                   |
| Millet       |                  | 1.8                  | 5.4                   |                  | 1.4                  | 4.4                   |
| Sorghum      | FB <sub>1</sub>  | 1.5                  | 4.4                   | FB <sub>2</sub>  | 3.5                  | 10.6                  |
| Maize        |                  | 2.4                  | 7.3                   |                  | 1.9                  | 5.9                   |
| Mixed cereal |                  | 0.9                  | 2.6                   |                  | 1.7                  | 5.3                   |
| Brown rice   |                  | 12.6                 | 38.3                  |                  | 1.9                  | 5.8                   |
| Millet       |                  | 15.3                 | 46.4                  |                  | 2.5                  | 7.5                   |
| Sorghum      | HT-2             | 15.3                 | 46.4                  | T-2              | 4.0                  | 12.0                  |
| Maize        |                  | 11.6                 | 35.1                  |                  | 6.3                  | 19.2                  |
| Mixed cereal |                  | 4.0                  | 12.2                  |                  | 3.1                  | 9.3                   |
| Brown rice   |                  | 0.6                  | 1.9                   |                  |                      |                       |
| Millet       |                  | 2.3                  | 7.0                   |                  |                      |                       |
| Sorghum      | OTA              | 2.3                  | 7.0                   |                  |                      |                       |
| Maize        |                  | 1.8                  | 5.4                   |                  |                      |                       |
| Mixed cereal |                  | 0.4                  | 1.4                   |                  |                      |                       |
